# Supplementary material for: Binding behaviors and structural characteristics of ternary complexes of β-lactoglobulin, curcumin, and fatty acids
Source: Royal Society of Chemistry journal article supplement (doi:10.1039/c7ra09012a), 2017-01-01
Supplement: c7ra09012a1.pdf [file c7ra09012a1.pdf]

**Electronic Supplementary Information for**

**Binding behaviors and structural characteristics of ternary complexes of  $\beta$ -lactoglobulin, curcumin, and fatty acids**

Jingwen Liu,<sup>a,b</sup> Lun Jiang,<sup>a,b</sup> Yunyue Zhang,<sup>a,b</sup> Zhongyao Du,<sup>a,b</sup> Xiaoxia Qiu,<sup>a,b</sup>  
Lingyan Kong<sup>c</sup> and Hao Zhang<sup>\*,a,b</sup>

<sup>a</sup> Beijing Advanced Innovation Center for Food Nutrition and Human Health, College of Food Science and Nutritional Engineering, China Agricultural University, Beijing 100083, P. R. China

<sup>b</sup> Key Laboratory of Functional Dairy, Co-constructed by Ministry of Education and Beijing Government, and Beijing Laboratory of Food Quality and Safety, China Agricultural University, Beijing 100083, P. R. China

<sup>c</sup> Department of Human Nutrition & Hospitality Management, The University of Alabama, Tuscaloosa 35487, AL, United States

\* Corresponding Author:

Hao Zhang

Tel: +86-10-62736344; Fax: +86-10-62736344; E-mail: zhanghaocau@cau.edu.cn

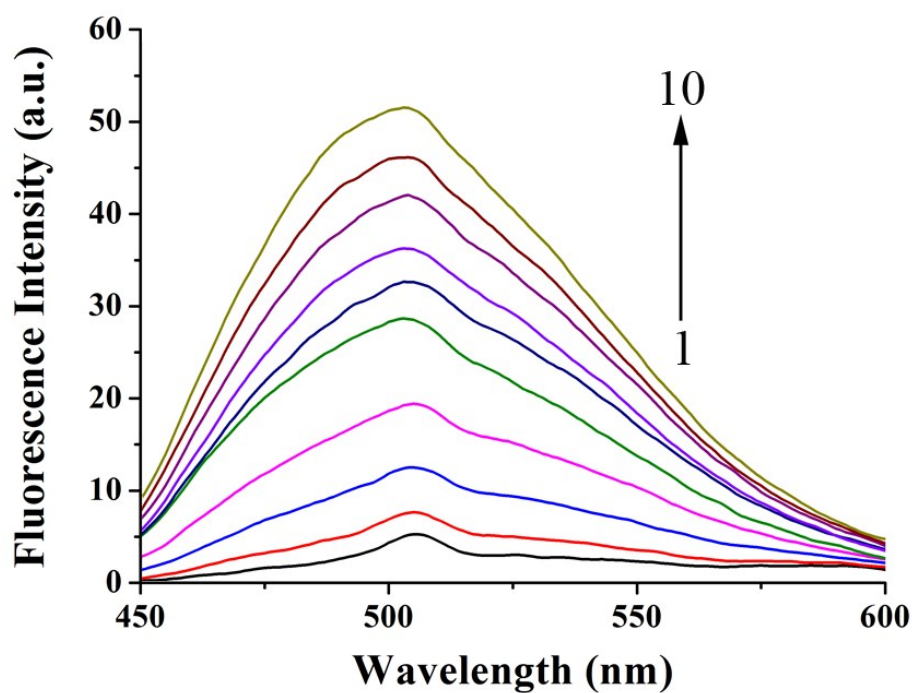

**Fig. S1** Fluorescence emission spectra of curcumin (2 μM) in buffer solution in the presence of β-Ig at different concentrations.  $C_{\beta\text{-Ig}} = 0, 3, 9, 12, 15, 18, 21, 24, 27, 30$  μM (labeled as 1 to 10). The emission spectra were recorded from 450 nm to 600 nm with an excitation wavelength of 425 nm.

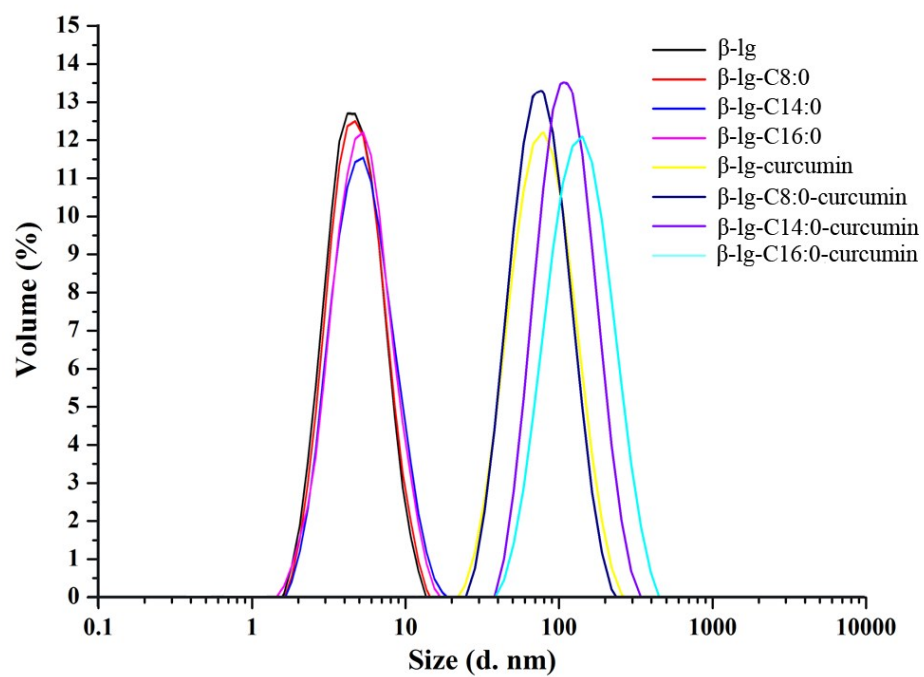

**Fig. S2** Particle size distribution curves for the samples determined based on dynamic light scattering data.

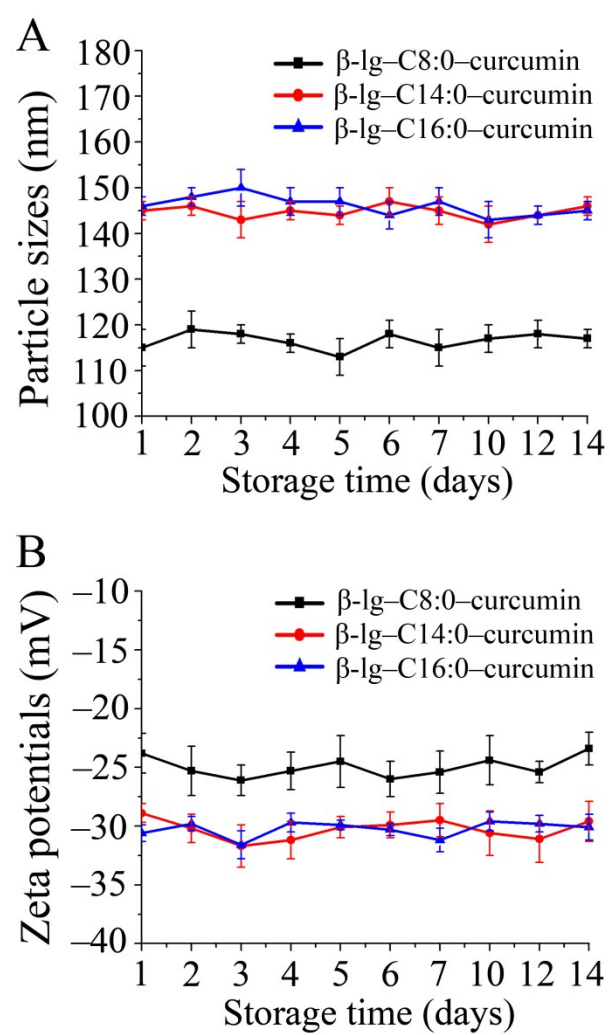

**Fig. S3** The mean sizes (A) and zeta potentials (B) of the samples at 4°C during 14 days storage.

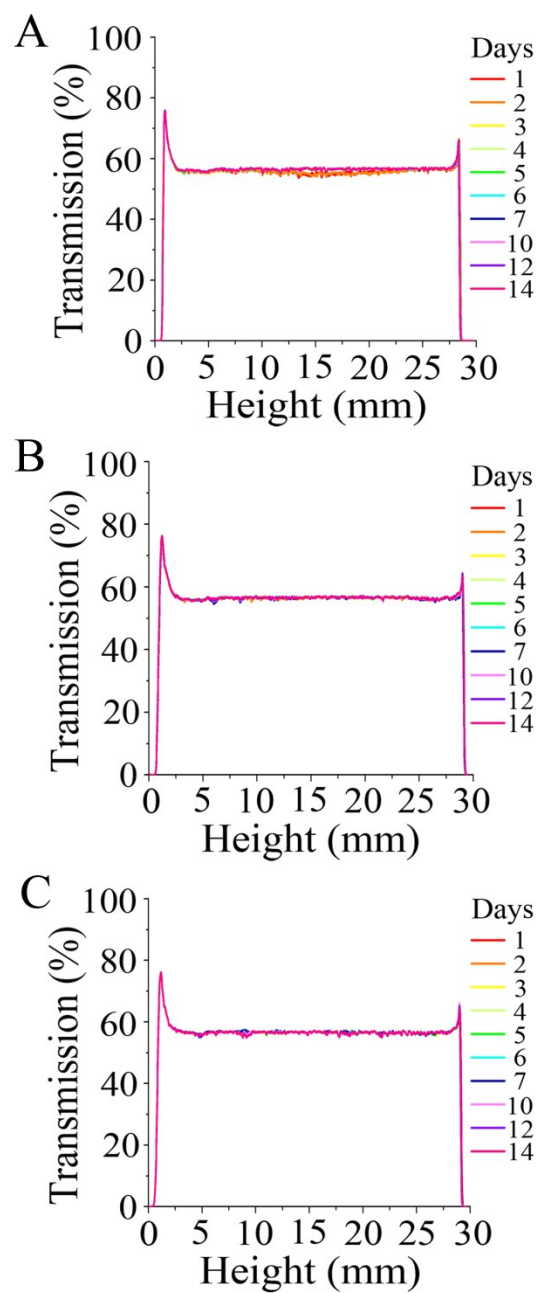

**Fig. S4** Transmission profiles of the samples at 4°C during 14 days storage using Turbiscan analysis. (A), (B) and (C) show the profiles of  $\beta$ -lg-C8:0-curcumin,  $\beta$ -lg-C14:0-curcumin, and  $\beta$ -lg-C16:0-curcumin ternary complexes, respectively.

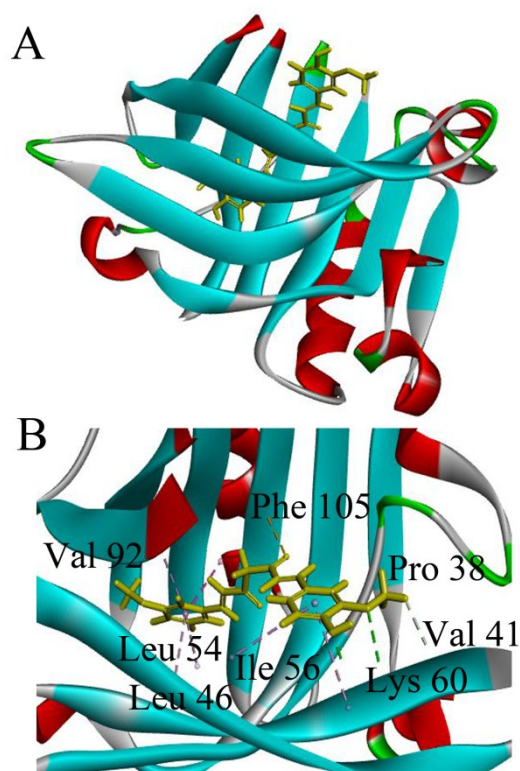

**Fig. S5** Docked structure corresponding to the minimum energy conformation for the  $\beta$ -lg-curcumin complex. (A) Overview of binding behaviors of  $\beta$ -lg with curcumin. (B) Detailed illustration of the amino acids near curcumin. In the complex, the yellow ligand represents curcumin.

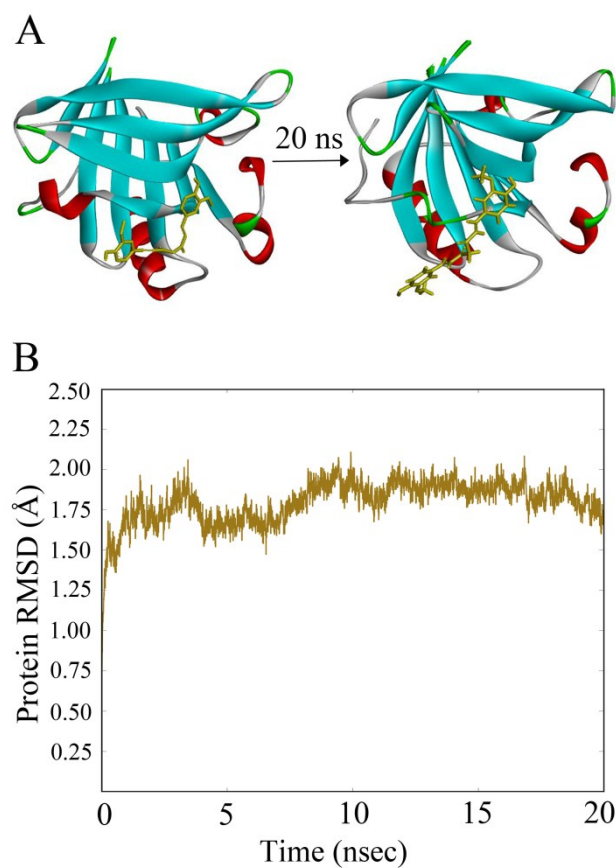

**Fig. S6** The conformation changes (A) and the root mean square deviation (RMSD) values (B) of complex during molecular dynamics simulation. In the complex, the yellow ligand represents curcumin.
